1 **The ghr-miR164 and GhNAC100 module participates in cotton plant defence**  
2 **against *Verticillium dahliae***

3

4 Guang Hu<sup>1,3†</sup>, Yu Lei<sup>1†</sup>, Le Wang<sup>1,3†</sup>, Jianfen Liu<sup>1</sup>, Ye Tang<sup>1,3</sup>, Zhennan Zhang<sup>1</sup>,  
5 Aiming Chen<sup>4</sup>, Qingzhong Peng<sup>3</sup>, Zuoren Yang<sup>2\*</sup>, Jiahe Wu<sup>1\*</sup>

6

7 **Authors addresses:**

8 <sup>1</sup> The State Key Laboratory of Plant Genomics, Institute of Microbiology, Chinese  
9 Academy of Sciences, Beijing, 100101, China.

10 <sup>2</sup> The State Key Laboratory of Cotton Biology, Institute of Cotton Research, Chinese  
11 Academy of Agricultural Sciences, Anyang, Henan, 455000, China.

12 <sup>3</sup> College of Biology and Environmental Sciences, Jishou University, Jishou, Hunan,  
13 416000, China.

14 <sup>4</sup> Key Laboratory for the Creation of Cotton Varieties in the Northwest, Ministry of  
15 Agriculture, Join Hope Seeds CO. Ltd, Changji, Xinjiang, 831100, China.

16

17 † G. H., Y. L., L. W., contributed equally to this study.

18 \* Corresponding author: J. W., Z. Y.

19

20 **Authors emails:**

21 Guang Hu: [hugu2012@163.com](mailto:hugu2012@163.com)

22 Yu Lei: [ly2806815rising@163.com](mailto:ly2806815rising@163.com)

23 Le Wang: [wangle510@foxmail.com](mailto:wangle510@foxmail.com)

24 Jianfen Liu: [1572896847@qq.com](mailto:1572896847@qq.com)

25 Ye Tang: [2446448997@qq.com](mailto:2446448997@qq.com)

26 Zhennan Zhang: [527861901@qq.com](mailto:527861901@qq.com)

27 Aiming Chen: [chenaimin@jiuheseed.com](mailto:chenaimin@jiuheseed.com)

28 Qingzhong Peng: [qzpengjsu@163.com](mailto:qzpengjsu@163.com)

29 Zuoren Yang, e-mail: [yangzuoren4012@163.com](mailto:yangzuoren4012@163.com)

30 Jiahe Wu, e-mail: [wujiahe@im.ac.cn](mailto:wujiahe@im.ac.cn), fax/tel: 86 10 6480 7375,

31

32 **Highlight:**

33 According to degradome and sRNA sequencings of cotton root in responses to

34 *Verticillium dahliae* at the later induction stage, many miRNAs and corresponding

35 targets including ghr-miR164-GhNAC100 module participate plant defence.

36

37 **Abstract**

38 Previous reports have shown that many miRNAs were identified at the early induction  
39 stage during which *Verticillium dahliae* localizes at the root surface. In this study, we  
40 constructed two sRNA libraries of cotton root responses to this fungus at the later  
41 induction stage when the pathogen enters the root vascular tissue. We identified 71  
42 known miRNAs and 378 novel miRNAs from two pathogen-induced sRNAs and the  
43 control libraries. Combined with degradome and sRNA sequencing, 178  
44 corresponding miRNA target genes were identified, in which 40 target genes from  
45 differentially expressed miRNAs were primarily associated with oxidation-reduction  
46 and stress responses. More importantly, we characterized the ghr-miR164-GhNAC100  
47 module in the response of the plant to *V. dahliae* infection. A GUS fusion reporter  
48 showed that ghr-miR164 directly cleaved the mRNA of *GhNAC100* in the  
49 post-transcriptional process. ghr-miR164-silencing increased the resistance of the  
50 plant to this fungus, while the knockdown of *GhNAC100* elevated the susceptibility of  
51 the plant, indicating that ghr-miR164-GhNAC100 modulates plant defence through  
52 the post-transcriptional regulation. Our data documented that there are numerous  
53 miRNAs at the later induction stage that participate in the plant response to *V. dahliae*,  
54 suggesting that miRNAs play important roles in plant resistance to vascular disease.

55

56 **Keywords:** *Gossypium hirsutum* L., *Verticillium dahliae* Kleb, miR164, NAC100,  
57 later response, vascular disease

58

59 **Abbreviations:**

60 microRNA (miRNA), sRNA (small RNA), NAC (**n**o apical meristem, **A**rabidopsis  
61 transcription activation factor and **c**up-shaped cotyledon), qPCR (real-time  
62 quantitative polymerase chain reaction), dpi (days post inoculation), VIGS  
63 (virus-induced gene silencing), *TRV* (*tobacco rattle virus*), *PDS* (*Phytoene*  
64 *desaturase*), DI (disease index), STTM (small tandem target mimic), jasmonic acid  
65 (JA), salicylic acid (SA).

## 66 **Introduction**

67 Cotton (*Gossypium hirsutum* L.) is a vital textile and oil crop in the world, but its  
68 productivity is constrained by various biotic and abiotic stresses (Xie *et al.*, 2015).  
69 One of the stresses is Verticillium wilt, which is a highly destructive vascular disease  
70 primarily caused by the soil-borne fungus *Verticillium dahliae* Kleb (Bhat and  
71 Subbarao, 1999). The representative symptoms of diseased cotton plants include leaf  
72 curl, necrosis and defoliation, and stem wilt (Sink and Grey, 1999). *V. dahliae*  
73 generally enters into the vascular tissue through wounded root sites and colonizes and  
74 grows in xylem vessels and other dead cell tissues (Bejaranoalcazar *et al.*, 1997;  
75 Klosterman *et al.*, 2009). Although no disease symptoms are evident at the stage of  
76 pathogen colonization in the xylem vessels, molecular mechanisms, including  
77 physiological and biochemical status, should result in remarkable changes in the root  
78 cells, especially those around the vascular tissues, resulting from a substantial amount  
79 of gene expression reprogramming at the transcription and translation levels.

80 microRNA (miRNA) is an important component in the post-transcriptional  
81 regulation of the target gene expression, playing major roles in plant development and  
82 stress responses (Jones-Rhoades *et al.*, 2006). miRNAs can recognize corresponding  
83 mRNA targets based on sequence complementarities and guide the direct cleavage of  
84 target mRNAs and/or translational repression (Li *et al.*, 2013). Recently,  
85 miRNA-mediated gene silencing was found to play a significant role in plant defence  
86 against pathogens (Khraiwesh *et al.*, 2012; Shriram *et al.*, 2016). For example,  
87 Arabidopsis miR393 was the first miRNA discovered to be involved in plant  
88 immunity (Navarro *et al.*, 2006). Overexpressing both miR160a and miR398b in rice  
89 (*Oryza sativa*) increased the resistance of the plant to *Magnaporthe oryzae* as  
90 demonstrated by decreased fungal growth and the upregulated expression of  
91 defence-related genes in transgenic rice plants (Li *et al.*, 2014). In cotton plants  
92 infected with the fungus, the production of miR166 and miR159 was increased and  
93 outputted into the fungal hyphae of *V. dahliae* for specific silencing (Zhang *et al.*,  
94 2016). When miR482 was silenced in the cotton plants, the expression of the

95 *NBS-LRR* defence genes was upregulated, resulting in increasing resistance to fungal  
96 pathogen attack (Zhu *et al.*, 2013). Wang *et al.* (2017a) reported that the  
97 ghr-miR5272a-mediated regulation of *GhMKK6* transcription contributes to the cotton  
98 plant immune response. The evidence is demonstrated in the participation of the  
99 cotton miRNAs in plant defence, but the molecular mechanisms and mode of  
100 regulation of miRNAs and their corresponding target genes are still unclear.

101 miRNAs directly participate in various classes of gene expression by  
102 post-transcriptional regulation. Among those genes, many transcriptional factors,  
103 including NAC, MYB and WRKY, are post-transcriptionally regulated by miRNA,  
104 repressing/promoting the expression of downstream genes (Schwechheimer *et al.*,  
105 1998; Hao *et al.*, 2012; Yu *et al.*, 2012). The name of NAC comes from acronym of  
106 NAM (no apical meristem), ATAF (Arabidopsis transcription activation factor) and  
107 CUC (cup-shaped cotyledon), which contains a miR164 complementary site with few  
108 mismatches (Ooka *et al.*, 2003; Nuruzzaman *et al.*, 2010). NAC is negatively  
109 regulated by miR164 to participate in development and defence (Baker *et al.*, 2005;  
110 Sieber *et al.*, 2007). In Arabidopsis, miR164 targets the transcripts of six *NAC* genes  
111 and prevents organ boundary enlargement and the formation of extra petals during  
112 flower development (Laufs *et al.*, 2004; Mallory *et al.*, 2004). ORE1, an NAC  
113 transcription factor, is involved in leaf cell death through miRNA164 regulation (Kim  
114 *et al.*, 2009). The miR164 function in the responses of plants to biotic stresses has  
115 been verified through the regulation of its corresponding target genes (Bazzini *et al.*,  
116 2007; Bazzini *et al.*, 2009; Jia *et al.*, 2009; Xin *et al.*, 2010; Zhao *et al.*, 2012; Feng *et al.*,  
117 2014). Among these target genes, TaNAC21/22 participated in the resistance of  
118 wheat plants to stripe rust regulated by tae-miR164 (Feng *et al.*, 2014).

119 miRNA expression sequencing in the early response of the cotton plants to *V.*  
120 *dahliae* infection has been reported, which showed that many early induction  
121 miRNAs were observed that possibly participated in plant defence (Yin *et al.*, 2012;  
122 He *et al.*, 2014; Zhang *et al.*, 2015a). For example, Yin *et al.* (2012) investigated the  
123 transcriptional profile of the miRNAs in *Verticillium*-inoculated cotton roots at 12 and  
124 24 hours and identified 215 miRNA families and 14 novel miRNAs. Two small RNA

125 (sRNA) libraries were constructed from the seedlings of the upland cotton variety  
126 KV-1 inoculated with *V. dahliae* at 24 and 48 hours; 37 novel miRNAs were identified,  
127 and potential target genes of these miRNAs were predicted (He *et al.*, 2014). Zhang *et*  
128 *al.* (2015a) conducted sRNA sequencing and degradome sequencing of cotton roots  
129 inoculated with *V. dahliae* at 24 hours and identified 140 known miRNAs and 58  
130 novel miRNAs. However, in the later stage of fungal-infected plants (*V. dahliae* has  
131 colonized in xylem vessels), the response of miRNA expression has not been  
132 investigated using miRNA sequencing.

133 In this study, we investigated the sRNA expression profiles in cotton roots  
134 inoculated by *V. dahliae* at 7 and 10 days and analysed the difference in the  
135 expression of known and novel miRNAs compared to mock-treated plants, as well as  
136 the functional analysis of the corresponding target genes through sRNA  
137 high-throughput and degradome sequencing. The results showed that 71 known  
138 miRNAs and 378 novel miRNAs were identified from three sRNA libraries, and 40  
139 corresponding target genes from differentially expressed miRNAs were found by  
140 coupling with degradome sequencing. In the late stage of the roots infected by *V.*  
141 *dahliae*, many miRNAs showed a significant difference in their expression level  
142 compared to the mock-treated roots. Among these differentially expressed miRNAs,  
143 gh-miR164 and its target gene *GhNAC100* were found to form a module to participate  
144 in the plant resistance to *V. dahliae* through genetic and biochemical analyses. These  
145 findings reveal a miRNA-mediated regulatory network with a critical role in the plant  
146 response of pathogen infestation in the main battlefield of vascular tissues.

147

148

## 149 **Materials and methods**

### 150 **Plant growth condition and treatment**

151 *G. hirsutum* cv. Jihe713 was donated by Prof. Xiaoli Luo from the Institute of Cotton  
152 Research, Shanxi Academy of Agricultural Science. Seedlings grew in a greenhouse  
153 at 28°C under a 16-h light/8-h dark photoperiod.

154 To conduct high-throughput sRNA and degradome sequencing at the two-leaf

155 stage, cotton plants under hydroponic conditions were inoculated with *Verticillium*  
156 *dahliae* strain V991. The 7- and 10-day post inoculation roots, as well as the  
157 mock-treated control, were harvested. The inoculated roots were treated ultrasonically  
158 (30 seconds with a gap of 30 seconds, repeated 5 times) to remove the fungal hyphae  
159 and conidia on their surface. Three types of samples were immediately frozen in  
160 liquid nitrogen and stored at -80°C prior to the RNA isolation. The same experiment  
161 was repeated twice.

162 *Nicotiana benthamiana* plants were grown in the greenhouse under a 16-h  
163 light/8-h dark photoperiod at 23°C for gene transient expression analyses.

164

#### 165 **Fungal cultivation and inoculation**

166 *V. dahliae* strain V991, a strongly pathogenic defoliating isolate, was cultured on  
167 potato dextrose agar (PDA) media for a week at 25°C. The mycelia were transferred  
168 into Czapek-Dox media for a week at 25°C with shaking (180 rpm) to collect the  
169 conidia. For *V. dahliae* infection, the roots of cotton plants were dipped with a  
170 conidial suspension ( $10^6$  conidia mL<sup>-1</sup>) for 50 min. Subsequently, the plants were  
171 transferred into fresh, steam-sterilized water for culture or planted into the pot with  
172 soil.

173

#### 174 **RNA extraction and qPCR analysis**

175 Total RNA was isolated from cotton samples using the PureLink Plant RNA Reagent  
176 (Life Technologies, USA) according to the manufacturer's instructions. First-strand  
177 cDNA was synthesized using an EasyScript First-Strand cDNA Synthesis SuperMix  
178 (TransGen, Beijing, China). miRNA first-strand cDNA synthesis, qPCR analysis and  
179 primer design were conducted as described by Varkonyi-Gasic *et al.* (2007). The  
180 qPCR experiment was performed using a TransStart Top Green qPCR SuperMix Kit  
181 (TransGen, Beijing, China) in a 20 µL reaction volume on a CFX96™ Real-time  
182 Detection System (Bio-Rad Laboratories, Inc., Hercules, Calif). The PCR programme  
183 was as follows: pre-denaturation at 95 °C for 30 s, 40 cycles of 95 °C for 15 s, 55 °C  
184 for 15 s and 72 °C for 15 s, and a melt cycle from 65 to 95 °C. The  $2^{-\Delta\Delta CT}$  method



185 was used to determine the relative expression levels of the miRNAs and target genes.  
186 The *UBQ7* gene from *G. hirsutum* was used as an internal control.

187 Fungal biomass quantification with qPCR techniques was performed as  
188 described previously (Wang *et al.*, 2017b). The primer pairs to detect the *V. dahliae*  
189  $\beta$ -*tubulin* gene and the cotton gene *Actin* were used for qPCR. The same experiment  
190 was conducted using three biological replicates. The primers used for qPCR are listed  
191 in Supplementary Table S11.

192

### 193 **Construction of the sRNA and degradome libraries**

194 The cotton sRNA libraries were constructed using an NEB Next, Ultra sRNA Sample  
195 Library Prep Kit (Illumina, San Diego, CA, USA) according to the manufacturer's  
196 instructions. sRNA was purified from 1.5  $\mu$ g of the total RNA by using the sRNA  
197 Sample Pre Kit and ligated first to a 5' RNA adaptor and then to a 3' RNA adaptor  
198 using T4 RNA Ligase 1 and T4 RNA Ligase 2 (truncated). Reverse transcription  
199 synthesis cDNA was purified by polyacrylamide gel electrophoresis as the sRNA  
200 library. The sRNA libraries were subjected to high-throughput sequencing with  
201 HiSeq2500 (Illumina, San Diego, CA, USA) with a read length of single-end (SE) 50  
202 nt at the Biomarker Technologies Company in Beijing.

203 The cotton degradome libraries were constructed as previously described  
204 (German *et al.*, 2008). Briefly, a 5' RNA adaptor with a *Mme* I recognition site at the 3'  
205 end was ligated to the resulting 42 bp (base pair) fragments consisting of a free  
206 phosphate at the 5' end followed by reverse transcription to cDNA. After PCR  
207 amplification, they were digested by the enzyme *Mme* I and ligated to an Illumina 3'  
208 TruSeq adaptor, followed by PCR amplification with a library-specific index primer  
209 and a common 5' primer for multiplex sequencing, gel-purified, and subjected to  
210 sequencing by synthesis (SBS) using HiSeq2500 (Illumina, USA) at the Biomarker  
211 Technologies Company in Beijing.

212

### 213 **Identification and analysis of known and novel miRNAs**

214 Raw sequences obtained from the three sRNA libraries were first cleaned by filtering  
215 out low-quality tags, poly(A) tags, and tags with 3' adaptor nulls, insert nulls, 5'  
216 adaptor contaminants, or those smaller than 18 nt. Using Bowtie tools soft (Langmead  
217 *et al.*, 2009), ribosomal RNA (rRNA), transfer RNA (tRNA), small nucleolar RNA  
218 (snoRNA) and other ncRNA and repeats were filtered from the clean reads,  
219 respectively, with the Silva, GtRNadb, Rfam and Repbase database sequence  
220 alignments. The remaining sequences from 18~30 nt long were used for miRDeep2  
221 and miRBase (<http://www.mirbase.org/ftp.shtml>) to identify conserved miRNAs and  
222 novel 5p- and 3- derived miRNAs (Friedlander *et al.*, 2012; Zhang *et al.*, 2015b).  
223 Only the sequences that were  $\leq 2$  mismatches with known miRNAs were considered  
224 as conserved miRNAs. Otherwise, the reads were defined as non-conserved reads.  
225 Unannotated reads were used to predict novel miRNAs based on the characteristic  
226 hairpin structure of the microRNA precursors using miRDeep2 (Friedlander *et al.*,  
227 2012). The miRDeep2 software was used to sequence the unannotated reads with the  
228 reference genome (TM-1 v1.1, <http://mascotton.njau.edu.cn/html>) to obtain the  
229 positional information on the reference cotton genome, which are mapped reads.

230

### 231 **Differential expression analysis**

232 The reads of each library were normalized by TPM (Transcript per million),  
233 normalized expression = (actual miRNA count/total count of clean reads)  $\times$  1,000,000  
234 (Fahlgren *et al.*, 2007). Differential expression analysis of the inoculated root libraries  
235 compared to the control was performed using the DESeq R package (Anders and  
236 Huber, 2010). To investigate differentially expressed miRNAs between the treated  
237 libraries and the control, the fold change of each identified miRNA was calculated as  
238 the ratio of read counts in the treatment libraries to the read counts in the control  
239 library followed by the transformation of  $\log_2$ . The value of the  $\log_2$  Ratio  $\geq 1$  or  $\leq -1$ ,  
240 indicating the ratio of fold change (FC) values for the treatments and control libraries,  
241 were considered to be significantly differentially expressed. To show the differential  
242 expression profiles, heatmaps and clusters were constructed for the miRNAs using

243 ImageGP (<http://www.ehbio.com/ImageGP/index.php/Home/Index/index.html>).

244

#### 245 **Identification of the miRNAs targets by degradome sequencing**

246 The sequences of clean full-length reads collated from the degradome sequencing  
247 were used for subsequent analysis after removing low quality sequences and adaptors.  
248 There were no mismatches allowed on the 10<sup>th</sup> and 11<sup>th</sup> nucleotides of the mature  
249 miRNAs where the splice site on miRNA targets generally occurs during degradome  
250 analysis. A potential miRNA target with a *P*-value of <0.05 by PAREsnip software  
251 was retained, and T-plot figures were drawn. All the target sequences were  
252 categorized into five classes based on the abundance of the degradome tags indicating  
253 miRNA-mediated cleavage. Category 0-4 was determined as previously described  
254 (Liu *et al.*, 2014).

255

#### 256 **Function enrichment analysis.**

257 The miRNA targets in the plants were predicted with TargetFinder software (Allen *et*  
258 *al.*, 2005). Gene Ontology (GO) enrichment analysis of the target genes  
259 corresponding to the miRNAs and differentially expressed miRNAs was implemented  
260 with GSeq R packages based on Wallenius non-central hyper-geometric distribution  
261 (Ashburner *et al.*, 2000).

262 KEGG (Kyoto Encyclopedia of Genes and Genomes, Kanehisa *et al.*, 2004) is a  
263 database resource to understand high-level functions and utilities of the biological  
264 system, such as the cell, the organism and the ecosystem, from molecular-level  
265 information, especially large-scale molecular datasets generated by genome  
266 sequencing and other high-throughput experimental technologies  
267 (<http://www.genome.jp/kegg/>). We used KOBAS software (Mao *et al.*, 2005) to test  
268 the statistical enrichment of differential expression genes in KEGG pathways.

269

#### 270 **Phylogenetic analysis**

271 The NAC genes in this study were retrieved from the NCBI data and aligned with the

272 Clustal X programme. Neighbour-joining (NJ) phylogenetic trees were constructed in  
273 MEGA 5.2 with 1,000 bootstrap replicas (Tamura *et al.*, 2011).

274

### 275 **Gene isolation and vector construction**

276 To elucidate the miR164 post-transcriptional regulating *GhNAC100* expression,  
277 *GhNAC100* was isolated from *G. hirsutum* cv. Jihe713, and the target sequence of  
278 *GhNAC100* was mutated by PCR methods and designated *GhNAC100<sup>mut</sup>*. *GhNAC100*  
279 and *GhNAC100<sup>mut</sup>* were inserted into pBI121, respectively, resulting in the  
280 pBI121-GhNAC100:GUS and pBI121-GhNAC100<sup>mut</sup>:GUS vectors. Cotton *MIR164*,  
281 the ghr-miR164 precursor sequences, was isolated and inserted into the pBI121  
282 instead of the *gus* gene, constructed in pBI121-pre-miR164.

283 For the virus-induced gene silencing (VIGS) analysis, *tobacco rattle virus*  
284 (TRV)-based vectors, including pTRV1 (pYL192), pTRV2 (pYL156) and pTRV2e  
285 were used in this study. TRV:PDS was employed as a positive control vector in the  
286 silenced plants, which had been previously reported by Pang *et al.* (2013). The  
287 construction of the TRV-related vectors was performed as described by Liu *et al.*  
288 (2004) and Sha *et al.* (2014). Briefly, a small tandem target mimic (STTM) sequence  
289 of ghr-miR164 containing two imperfect ghr-miR164 binding sites separated by a  
290 48-bp spacer with the restriction enzyme sites Kpn I and Xma I at the 5' and 3' ends,  
291 respectively, was designed and inserted into the pTRV2e vector to generate the  
292 TRV:STTM164 vector (Supplementary Table S11). A *GhNAC100* fragment was  
293 isolated and inserted into pTRV2, and the resulting vector was designated  
294 TRV:GhNAC100. All the plasmids were transformed into *A. tumefaciens* strain  
295 GV3101 using electroporation. All the primers associated with vector construction are  
296 listed in Supplementary Table S11.

297

### 298 **Gene transient expression analysis in *N. benthamiana* leaves**

299 *Agrobacterium* cells grown overnight at 28°C in lysogeny broth (LB) media  
300 containing 50 µg mL<sup>-1</sup> kanamycin, 50 µg mL<sup>-1</sup> gentamicin and 50 µg mL<sup>-1</sup> rifampicin  
301 were collected and resuspended in infiltration media (MMA buffer, 10 mM MgCl<sub>2</sub>, 10

302 mM MES-NaOH, and 200  $\mu$ M acetosyringone; OD<sub>600</sub>=0.8). After 3 h of incubation,  
303 the suspensions were infiltrated into the *N. benthamiana* leaves using a 2 mL  
304 needleless syringe.

305

### 306 **GUS activity analysis**

307 At 48 hours after agro-infiltration, the treated leaves were detached, and  
308  $\beta$ -Glucuronidase (GUS) staining analysis was performed as described by Jefferson *et*  
309 *al.* (1987). GUS activity was quantified by 4-methylumbelliferone (4-MU) testing  
310 methods as described by Jefferson *et al.* (1987).

311

### 312 **Analysis of VIGS**

313 Agrobacterium culture and treatments were the same as the method of Agrobacterium  
314 co-transformation in tobacco described above. Agrobacterium cells containing  
315 *TRV:GhNAC100* or *TRV:STTM164* were mixed with an equal amount of  
316 Agrobacterium cells with pTRV1 (pYL192). The mixed Agrobacterium cells were  
317 agro-inoculated into the fully expanded cotyledons of the cotton seedlings using a  
318 sterile needleless syringe. After 12 hours incubation in darkness, the cotton seedlings  
319 were transferred to the greenhouse for normal growth.

320

### 321 ***V. dahliae* recovery assay**

322 To determine the effects of a *V. dahliae* infection on cotton, we collected the stems  
323 and roots of the infected plants to analyse the fungal recovery potential. The samples  
324 were cut into many fragments and placed on PDA in plates, which were incubated at  
325 25°C. After 5 days, the number of fragments with fungal hypha was recorded.

326

### 327 **Disease index (DI) analysis**

328 The DI is an important parameter to assess plant resistance. The DI is calculated  
329 according using the following formula:  $DI = [(\sum \text{disease grades} \times \text{number of infected}$   
330  $\text{plants}) / (\text{total checked plants} \times 4)] \times 100$ . Seedlings were classified into five grades  
331 (grade 0, 1, 2, 3, and 4) based on the disease severity after *V. dahliae* infection as

332 described by Wang *et al.* (2004).

333

334

## 335 **Results**

### 336 ***V. dahliae* colonization and growth in the root interiors**

337 In our previous studies, cotton plants started to show disease symptoms 15-18 days  
338 after inoculation with *V. dahliae*, including yellow leaves, defoliation and stunted  
339 growth. However, before the presence of the disease symptoms, it is unclear how the  
340 plants resist colonization and the upward dispersion of the fungal pathogen in the  
341 interior of plants (primarily xylem vessels). To investigate the colonization of the  
342 pathogen and its spread in the xylem vessels, root samples from the seedlings  
343 inoculated with *V. dahliae* for 1, 4, 7, 10 and 13 days were first treated by ultrasound  
344 to remove the fungal hyphae and spores on their surface, and the fungal DNA levels  
345 were examined by qPCR. The DNA of *V. dahliae* was barely detectable at 1 and 4  
346 days post inoculation (dpi), indicating that few pathogens enter the root interior.  
347 While at 7 dpi, a few fungal DNA molecules were monitored in the roots, a value of  
348  $1.03 \times 10^{-4}$  compared to the cotton DNA copies; at 10 and 13 dpi, relative DNA copies  
349 of the fungal pathogen were approximately  $1.25 \times 10^{-3}$  and  $1.52 \times 10^{-3}$ , respectively,  
350 suggesting that the *V. dahlia* hyphae and conidia had located in the xylem vessels  
351 (Figure 1A). To investigate when the fungus colonizes in the interior of roots in more  
352 detail, a fungal recovery assay of the treated root fragments was conducted as a  
353 parallel experiment. Consistent with the results of the fungal DNA analysis, fungi  
354 were not observed around the root sections at 1 and 4 dpi, while approximately 5% of  
355 the root fragments showed fungi growth at 7 dpi, and a few fragments at 10 and 13  
356 dpi demonstrated recoverable growth of the fungi (Figure 1B and 1C). These results  
357 suggested that *V. dahliae* had colonized in the inside of the roots through root-dipped  
358 inoculation after 7 dpi. To evaluate the interaction of the plant with the pathogen  
359 associated with miRNA regulation function in the root vascular tissue, the  
360 fungal-treated roots at the two time-points, 7 and 10 days, were chosen for sRNA

361 high-throughput sequencing analysis.

362

### 363 **High-throughput sequencing of sRNA**

364 To characterize the sRNA profiles in the cotton plants challenged by *V. dahliae*  
365 infection, three sRNA libraries were constructed by using total RNA isolated from the  
366 root samples of seedlings treated for 7 and 10 days and the mixed mock treatment of 7  
367 and 10 days (the control, CK) with two replicates for each treatment. The three  
368 libraries were sequenced with an Illumina HiSeq 2500, and a schematic flow of the  
369 sequencing and data analysis strategy is shown in Figure S1. As shown in Table 1, the  
370 three libraries for 7 and 10 dpi and the control generated more than 20 million clean  
371 reads, 20221992, 35104139 and 34150616, respectively. Through annotation analysis  
372 with the Silva, GtRNadb, Rfam and Rfam databases, the sRNAs were grouped  
373 into several classes: repeat bases, rRNA, tRNA, snoRNA, and unannotated sRNA  
374 (Table 1). Before analysing the miRNA, the unannotated sRNA was mapped to the *G.*  
375 *hirsutum* cv TM-1 genome. A total of 3775953, 3944094 and 4889704 reads in the 7-  
376 and 10-dpi and control libraries, respectively, were successfully matched back to the  
377 AD genome of *G. hirsutum*, respectively (Table 1). Although the total reads of the 7  
378 dpi sample were less than those of the 10 dpi and the control, the numbers of mapped  
379 unannotated reads containing miRNA were similar among the three libraries.

380 To further ensure the specificity and commonality of the sRNA in the three  
381 libraries, the unique reads calculated in the 7- and 10-dpi and the control sRNA  
382 libraries were 4686834, 6144606, and 6024129, respectively. There were specific and  
383 common sequence types shown in the comparison of the two libraries, such as  
384 3581183 and 4918478 specific unique reads and 1105651 common unique reads in the  
385 7 dpi vs the control libraries, 5130747 and 5013270 specific unique reads and  
386 1010859 common unique reads in the 10 dpi vs the control libraries, and 3815094 and  
387 5269866 specific unique reads and 871740 common unique reads in the 7 dpi vs 10  
388 dpi libraries (Figure 2A).

389 To investigate the size distribution of all the sequences, the sequences between

390 18 and 30 nt were determined in the number of matched unannotated reads. The size  
391 distribution for the matched reads was similar through observation of the three  
392 libraries, in which the 24 nt reads accounted for the majority, 43.41%, 32.93% and  
393 34.77% for 7 dpi, 10 dpi and the control, respectively, followed by 21 nt reads,  
394 accounting for 12.86%, 13.41% and 16.99%, respectively (Figure 2B). The results of  
395 the sRNA abundance and size in cotton were consistent with previous reports in  
396 cotton (Wang *et al.*, 2016) and consistent with the results reported in *Arabidopsis*  
397 *thaliana* (Rajagopalan *et al.*, 2006), *Oryza sativa* (Wei *et al.*, 2011), and *Glycine max*  
398 (Song *et al.*, 2011), suggesting that the sRNAs in plants are mainly composed of 21  
399 and 24 nt reads.

400

#### 401 **Identification of the miRNAs**

402 By using miRDeep2 analysis, we screened the unannotated sRNA sequences to  
403 identify miRNAs according to the criteria for the selection of a length of at least 18 nt  
404 and a maximum of two mismatches compared to all known plant miRNA sequences  
405 in the three libraries. After removing the repeat sequences, 71 annotated known  
406 miRNAs belonging to 46 miRNA families were identified; out of these, 70, 70 and 71  
407 were from the 7- and 10-d treated roots and the control roots, respectively  
408 (Supplementary Table S1). Of the 71 miRNAs across the three libraries, 69 miRNAs  
409 were commonly present in the three libraries, while ghr-miR7497 and ghr-miR399e  
410 were absent in the 7- and 10-dpi libraries, respectively (Figure 3C). Each of the 46  
411 miRNA families contained 1 to 4 members. The three families, MIR156, MIR2949  
412 and MIR482, possessed 4 members, while there were 30 other miRNA families with  
413 only one member (Figure S2). As shown in Supplementary Table S2, the expression  
414 levels of the miRNAs ranged widely from tens of thousands of sequence reads to  
415 fewer than 100. The MIR166 had the most abundant expression and reached over  
416 10000 TPM clean reads, which are highly conserved in mosses, eudicots and  
417 monocots (Arazi *et al.*, 2005; Barik *et al.*, 2014; Guo *et al.*, 2017; Shi *et al.*, 2017; Yip  
418 *et al.*, 2016). In addition, among the 46 miRNA families, 21 and 24 nt long miRNAs



419 represented the majority in size, reaching 38.03% and 32.39%, respectively, followed  
420 by the 20 nt long miRNAs (14.08%) (Supplementary Table S3).

421 To identify novel miRNAs, the unannotated sRNAs, which could be mapped to  
422 the cotton AD genome excluding the known miRNA, were screened using miRDeep2  
423 software. A total of 378 unknown sRNA sequences were supposed to be novel  
424 miRNAs with high confidence in the three libraries. There were 373, 372 and 377  
425 novel miRNAs in the 7- and 10-dpi libraries and the control library, respectively.  
426 Among these 378 novel miRNAs, approximately 367 were common across all three  
427 libraries, and only one novel specific miRNA (novel miR\_A02\_1323) was detected in  
428 the control library. The novel miR\_D09\_31005 was only found in the two treated  
429 libraries (Figure 2C).

430 In this study, nucleotide bias at positions in the total miRNAs was analysed to  
431 understand the miRNA sequence law. The results demonstrated that the first  
432 nucleotide of the miRNAs exhibited a preference for uracil (U) (Figure 2D, left panel),  
433 consistent with the results from many species possibly due to miRNA sequence  
434 conservation. In addition, nucleotide bias at each position is also shown in Figure 2D  
435 (right panel) consistent with other plants (Mi *et al.*, 2008).

436

#### 437 **miRNA expression response to *V. dahliae* infection and the corresponding target** 438 **prediction**

439 The identified miRNAs with more than 5 TPM expression levels were chosen for an  
440 analysis of differential expression among the 7- and 10-d treated roots and the control.  
441 As shown in Supplementary Table S4, 28 out of 71 (39.44%) known miRNAs and  
442 148 out of 378 (39.15%) novel miRNAs were differentially expressed in the two  
443 pathogen-induced libraries compared to the mock-treated control (absolute value of  
444  $\log_2$  ratio  $\geq 1$ ). Among all the differentially expressed miRNAs, 5 and 29  
445 differentially expressed miRNAs, respectively, from the known and novel miRNAs  
446 were found in both the 7- and 10-d treated roots compared to the control (Figure 3A).  
447 Twenty-nine miRNAs showed significant upregulation or down regulation of

448 expression in both treated libraries (Cluster 1 and 3); 4 miRNAs exhibited upregulated  
449 expression in the 7-d treated roots and downregulation in the 10-d treated roots, and  
450 only one miRNA showed a contrasting trend (Cluster 2).

451 To further investigate the function of differentially expressed miRNAs, the  
452 corresponding target genes were predicted, and GO enrichment was performed.  
453 According to TargetFinder software and the GO classifications, the 405 target genes  
454 of the differentially expressed miRNAs were predicted and associated with many GO  
455 terms in the 7- and 10-d libraries compared to the control, primarily including binding  
456 and oxidoreductase activity (Supplementary Table S5 and S6).

457

#### 458 **Identification and functional enrichment of the miRNA targets by degradome** 459 **combined with sRNA sequencing**

460 To identify the target genes from a total of 449 miRNAs, degradome sequencing  
461 through the next-generation deep sequencing technique was performed. A total of 178  
462 target genes of the miRNAs in the cotton root RNA library was identified.  
463 Twenty-five of the 71 known miRNAs regulated 75 target transcripts, and 172 of the  
464 378 novel miRNAs possessed 142 target genes (Supplementary Table S7 and Table  
465 S8). miRNAs were found to be able to target various numbers of genes with a range  
466 of 1 to 16, of which novelmiR\_D05\_23410 targeted the highest number of genes,  
467 reaching 16 different genes (Supplementary Table S8). As shown in Figure 3B,  
468 examples of some confirmed defence-related miRNA targets as ‘target plots’ (T-plots)  
469 were drawn, which describe the cleavage sites of the target sequences by the action of  
470 different miRNAs.

471 Among the 178 target genes identified from degradome sequencing confirmed by  
472 sRNA sequencing, 40 target genes were associated with the differentially expressed  
473 miRNAs. According to the GO classifications, the 40 target genes of the differentially  
474 expressed miRNAs predominantly participated in 61 biological process categories, 53  
475 molecular function categories and 16 cellular component categories (Supplementary  
476 Table S9). Most specific GO classifications showed that the target genes were

477 involved in the response to oxidation-reduction process, the response to biotic and  
478 abiotic stress, and binding (Supplementary Table S9). The KEGG analysis classified  
479 11 different expression miRNA targets into 10 pathways, and the significantly  
480 enriched pathways included terpenoid backbone biosynthesis, carotenoid biosynthesis  
481 and spliceosome (Supplementary Table S10).

482

#### 483 **Expression authenticity of miRNAs and the corresponding target genes using** 484 **qPCR.**

485 To further confirm the authenticity of the sRNA high-throughput sequencing and  
486 identify targets by degradome sequencing, the expression abundance of the miRNAs  
487 and their corresponding target genes was tested by qPCR. Six different expression  
488 level miRNAs (4 known miRNAs and 2 novel miRNAs) and their corresponding  
489 target genes were chosen to analyse the expression levels in 10-d treated roots and the  
490 control. The expression levels of 4 miRNAs, ghr-miR164, ghr-miR3476-5,  
491 ghr-miR398 and novelmiR\_D13\_39000, decreased remarkably compared to the  
492 control, while the expression levels of ghr-miR7495a and novelmiR\_D04\_22772  
493 increased significantly, similar to the results of the sRNA sequencing (Figure 3C and  
494 Supplementary Table S4). The expression levels of six corresponding target genes  
495 compared to the control showed contrasting trends with the miRNAs, indicating that  
496 the six miRNAs negatively regulated the mRNA levels of the corresponding target  
497 genes (Figure 3C).

498

#### 499 **Expression regulation of *GhNAC100* by a ghr-miR164 post-transcriptional** 500 **process**

501 Based on the degradome and sRNA sequencing, we selected ghr-miR164 to further  
502 evaluate the regulatory functions of the miRNA-target modules in the resistance of the  
503 plant to the fungus. The ghr-miR164 target gene was identified as Gh\_A11G0290,  
504 shown to be an NAC domain-containing protein 100-like according to the BLAST  
505 data. A phylogenetic tree shows that cotton NAC100-like is clustered with  
506 AtNAC100 (57.36% identification) and was designated GhNAC100 (Figure 4A). The

507 results of qPCR analysis showed that the ghr-miR164 expression level decreased  
508 approximately 65% in the 10-d treated roots compared to the control consistent with  
509 the sRNA sequencing data, while *GhNAC100* was upregulated in the treated roots,  
510 approximately 3.4-fold higher than in the control roots (Figure 3C).

511 In our degradome sequencing data, ghr-miR164 matched the target gene  
512 *GhNAC100*, and the cleavage site was identified in a matched sequence as shown in  
513 the T-plots (Figure 3B). The cleavage site is located at the 649 nt of *GhNAC100*  
514 mRNA, which was cleaved between the G and C bond (Figure 3B). To confirm this  
515 cleavage site, two specific forward primers were designed, which were located on  
516 both sides of cleavage site, respectively (Figure 4B), and qPCR analysis was  
517 conducted. As shown in Figure 4B, the amounts of the FD fragment downstream of  
518 the cleavage site were approximately 1.7-fold higher than the FU fragment containing  
519 the cleavage site.

520 To further verify the ghr-miR164 function in cleaving its target sequence *in vivo*,  
521 a GhNAC100:GUS reporter fusion protein was analysed by the *Agrobacterium*  
522 *tumefaciens*-mediated co-transformation technology in *Nicotiana benthamiana*. The  
523 precursor of ghr-miR164 was isolated and inserted into a plant expression vector  
524 driven by the CamV35S promoter, resulting in the construction of vector  
525 pBI121-pre-miR164 as an effector. The *GhNAC100*-encoding sequence and its  
526 corresponding mutant sequence were respectively fused into the upstream of the *GUS*  
527 gene in the plant expression vector pBI121, generating pBI121-GhNAC100:GUS and  
528 pBI121-GhNAC100<sup>mut</sup>:GUS as reporters (Figure 4C). As shown in Figure 4D, the  
529 leaves injected with GV3101 only containing pBI121 or pBI121-GhNAC100:GUS  
530 exhibited a similar blue intensity in the infiltrated site by GUS histochemical staining.  
531 When the leaves were infiltrated with equally mixed GV3101 cells containing  
532 pBI121-pre-miR164 or pBI121-GhNAC100:GUS, the blue spot was absent at the  
533 injected site, while the leaves co-infiltrated with mixed GV3101 cells containing  
534 pBI121-pre-miR164 or pBI121-GhNAC100<sup>mut</sup>:GUS showed a similar blue intensity to  
535 those only infiltrated with pBI121-GhNAC100:GUS (Figure 4D). Compatible with  
536 GUS staining, a quantitative assay of the GUS activity showed similar results in the

537 extracted total protein from the infiltrated sites of the leaf as indicated through 4-MU  
538 analysis (Figure 4E). The result of the GUS fusion protein reporter showed that  
539 ghr-miR164 could cleave *GhNAC100* by a post-transcriptional process *in vivo*.

540 To explore the role of the ghr-miR164-GhNAC100 module in the response of the  
541 plant to fungal infection, qPCR analysis was performed to measure the time course of  
542 the pathogen-responsive expression profile of ghr-miR164 and *GhNAC100*. The  
543 results showed that the accumulation of ghr-miR164 decreased in the roots and  
544 reached a minimum level at 36 hpi (Figure 4F). In contrast, the *GhNAC100* transcript  
545 level increased in the roots of plants challenged with *V. dahliae* and reached a  
546 maximal level at 48 hpi (Figure 4F). These data suggest that the ghr-miR164 content  
547 negatively regulated the *GhNAC100* expression level, participating in the plants  
548 inoculated with *V. dahliae*.

549

#### 550 **ghr-miR164 silencing improves plant resistance to *V. dahliae*.**

551 To determine the function of ghr-miR164 in plant defence, miRNA target mimicry  
552 technology was employed, which has been successfully used to suppress miRNA  
553 accumulation *in vivo* (Sha *et al.*, 2014; Yan *et al.*, 2012). We used the virus-based  
554 microRNA silencing (VbMS) strategy to generate the ghr-miR164-silenced plants.  
555 The pTRV2e-STTM164 vector, which contains two imperfect binding sites for  
556 ghr-miR164 separated by a 48 nt spacer, was constructed. The cotton *phytoene*  
557 *desaturase* (*GhPDS*) gene, a positive control, was well silenced resulting in a  
558 photobleaching phenotype (Figure S3), indicating that the TRV VIGS system is  
559 feasible in the cotton plant. Compared with the negative control plants inoculated with  
560 the empty vector (TRV:00, as the control), the abundance of ghr-miR164 transcripts  
561 was significantly reduced by approximately 50% in the *TRV:STTM164* cotton plants  
562 (Figure 5A). The *GhNAC100* expression level was also tested in these infected plants,  
563 showing an increase of approximately 2.5-fold compared to the *TRV:00* plants (Figure  
564 5A). These data suggested that we successfully knocked down the ghr-miR164  
565 expression in the *TRV:STTM164* plants by overexpressing STTM using the VbMS.  
566 *TRV:STTM164* plants and the control were infected with  $10^6$  *V. dahliae* conidia

567 through root-dipped inoculation. After 23 dpi, the *TRV:00* plants showed normal  
568 disease symptoms with wilting, yellowing leaves and stunted growth, while the  
569 *TRV:STTM164* plants exhibited obvious resistance to this fungus (Figure 5B). The DI  
570 value in the *TRV:STTM164* plants was significantly lower than that of the control  
571 plants, showing value 38, while the control showed 53 (Figure 5C). To examine the  
572 extent of the *V. dahliae* colonization in the infected stems, a fungal recovery assay  
573 was performed. There were fewer stem sections that provided fungal colonies in the  
574 *TRV:STTM164* plants than those in the *TRV:00* plants (Figure 5D). Consistent with the  
575 fungal recovery assay, the fungal biomass in the ghr-miR164-silenced plants  
576 decreased significantly to approximately 0.3-fold of the control plants (Figure 5E).

577

#### 578 **The ghr-miR164-GhNAC100 module regulates plant defence to *V. dahliae***

579 To clarify the roles of the ghr-miR164-GhNAC100 module in the resistance of the  
580 plant to *V. dahliae*, the *GhNAC100* gene was knocked down by a tobacco rattle virus  
581 (TRV)-mediated VIGS system. When the *PDS*-silenced plant leaves became chlorotic,  
582 we started to examine the *GhNAC100* expression levels of the plants injected by  
583 *Agrobacterium* containing the *TRV:GhNAC100* virus vector. According to the qPCR  
584 analysis, *GhNAC100* accumulation in the leaves infected with *TRV:NAC100*  
585 significantly decreased to approximately 61% of the plants infected with the *TRV:00*  
586 (Figure 5A). To evaluate the GhNAC100 function in the resistance to this fungus, the  
587 *GhNAC100*-silenced plants and the control were infected with *V. dahliae* through  
588 root-dipped inoculation. After 23 dpi, the *TRV:NAC100* plants showed more serious  
589 disease symptoms than the control plants with obvious necrotic and wilting leaves and  
590 stunted growth (Figure 5B). The DI value in the *GhNAC100*-silenced plants was  
591 significantly higher than that in the control (Figure 5C). A fungal recovery assay was  
592 performed to examine the extent of the *V. dahliae* colonization in the infected stem of  
593 the treated plants. The results showed that there were more fungal colonies in the  
594 *TRV:GhNAC100* plants than in the *TRV:00* plants (Figure 5D). Consistent with these  
595 results, the fungal biomass in the *GhNAC100*-silenced plants increased significantly,  
596 5.2-fold higher compared to the control plants. The results showed that *GhNAC100* is

597 possibly a positive regulator to increase plant resistance to *V. dahliae* (Figure 5E).

598 To investigate whether the regulation of the ghr-miR164-GhNAC100 module in  
599 plant defence was associated with the salicylic acid (SA) and jasmonic acid (JA)  
600 signalling pathways, the expression levels of both defence-related genes, *PRI* (SA  
601 signalling pathway) and *PDF1.2* (JA signalling pathway), were monitored in the  
602 *TRV:STTM164* and *TRV:GhNAC100* plants. As shown in Figure 5F, the *PRI*  
603 expression level increased remarkably in ghr-miR164-silenced plants compared to the  
604 wild-type plants, while it significantly decreased in the *GhNAC100*-silenced plants.  
605 Interestingly, the transcript levels of *PDF1.2* showed similar results to those of *PRI* in  
606 the *TRV:STTM164* and *TRV:GhNAC100* plants. The results indicated that the  
607 ghr-miR164-GhNAC100 module in plant defence may be involved in both the SA and  
608 JA signalling pathways.

609

610

## 611 Discussion

612 miRNAs participate in plant resistance to pathogens through post-transcriptional  
613 regulation of the expression level of the target genes. The response of the cotton  
614 plants to *V. dahliae* infestation may be divided into early and later stages, including  
615 the pathogen localizing in the surface of roots and entering their interior. Previous  
616 reports involving sRNA sequencing focused only on the early response of the plant to  
617 *V. dahliae* infection, which in general reacts before 48 hours after inoculation.  
618 However, there are few reports about the later response of the plant to this fungus  
619 after 4 days. In this study, we constructed 7- and 10-d infected root sRNA libraries  
620 with *V. dahliae* and identified many known and novel miRNAs. Differentially  
621 expressed miRNAs of the 7- and 10-day root-infected libraries were analysed  
622 compared to the mock control combined with degradome sequencing. The results  
623 showed that 71 known miRNAs and 378 novel miRNAs were identified from 7- and  
624 10-day root-infected and control libraries, and 34 differentially expressed miRNAs in  
625 both 7- and 10-d infected roots were analysed compared to the control. More  
626 importantly, a ghr-164-GhNAC100 module was selected to represent the miRNAs and



627 corresponding targets to perform functional dissection of plant defence against *V.*  
628 *dahliae*.

629 We identified 378 novel miRNAs from three sRNA libraries of roots inoculated  
630 with *V. dahliae* and the mock-treated control at 7- and 10-dpi when the fungus has  
631 entered the inner root tissues. However, previous studies showed that significantly  
632 fewer novel miRNAs were identified at 12, 24, 36 or 48 hours after inoculation (He *et*  
633 *al.*, 2014; Yin *et al.*, 2012; Zhang *et al.*, 2015a). For instance, 14 novel miRNAs were  
634 identified from *Verticillium*-inoculated cotton roots at 12 and 24 hours (Yin *et al.*,  
635 2012), 37 novel miRNAs were identified from two sRNA libraries of the cotton  
636 seedlings inoculated with *V. dahliae* at 24 and 48 hours (He *et al.*, 2014), and 58 novel  
637 miRNAs were identified from sRNA sequencing of the cotton roots inoculated with *V.*  
638 *dahliae* at 24 hours (Zhang *et al.*, 2015a). Thus, in this study, more novel miRNAs  
639 were identified, which may participate in the resistance of the plant to *V. dahliae* at  
640 the later stages of fungal infection.

641 At 7 and 10 days after inoculation, the plants should have a stronger response to  
642 fungal infection, possibly because *V. dahliae* has localized in the xylem vessels,  
643 unlike the pathogen surface-induced response at the early stage of inoculation.  
644 According to the GO analysis, the target genes of the differentially expressed  
645 miRNAs predominantly participated in many GO terms, including the  
646 oxidation-reduction process and stress response (Supplementary Table S9). KEGG  
647 analysis classified 11 miRNA targeting 10 pathways, and the significantly enriched  
648 pathways include terpenoid backbone biosynthesis, carotenoid biosynthesis and the  
649 spliceosome (Supplementary Table S10). However, in the literature associated with  
650 fungal surface-induced miRNAs, there is no data on the GO and KEGG analyses of  
651 target genes (He *et al.*, 2014; Yin *et al.*, 2012; Zhang *et al.*, 2015a). These results  
652 suggested that the internal induced response of the plant by *V. dahliae* infection may  
653 be stronger to participate in the resistance by modulating miRNA expression to  
654 post-transcriptionally regulate the target gene.

655 Based on sRNA and degradome sequencing, we chose the  
656 ghr-miR164-GhNAC100 module as representative to analyse the function of the



657 miRNAs coupling with their target genes in the resistance of the plant to *V. dahliae*.  
658 Our results showed that ghr-miR164 silencing elevated the resistance of the plants to  
659 this fungus, consistent with the results of its target *GhNAC100* knockdown, which  
660 increased the susceptibility of the plant to the pathogen. Therefore, the  
661 ghr-miR164-GhNAC100 module participates in plant defence against *V. dahliae*.  
662 Currently, there were some reports that miR164 modulates plant resistance through  
663 post-transcriptional regulation of its target gene expression. For instance, Arabidopsis  
664 NAC4 promoted pathogen-induced cell death under negative regulation by  
665 microRNA164 (Lee *et al.*, 2017). Feng *et al.* (2014) reported that TaNAC21/22  
666 participated in the resistance of wheat plants to stripe rust regulated by tae-miR164. In  
667 summary, our results documented that miR164 participates in plant defence against  
668 pathogens by post-transcriptionally regulating the expression of the NAC  
669 transcriptional factor.

670 In addition, the NAC is negatively regulated by miR164 through mRNA  
671 cleavage to participate in development excluding defence (Baker *et al.*, 2005; Sieber  
672 *et al.*, 2007). In Arabidopsis, miR164 targets the transcripts of six *NAC* genes and  
673 prevents organ boundary enlargement and the formation of extra petals during flower  
674 development (Laufs *et al.*, 2004; Mallory *et al.*, 2004). ORE1, an NAC transcription  
675 factor, is involved in leaf cell death through miRNA164 regulation (Kim *et al.*, 2009).  
676 In maize (*Zea mays* L.), miR164-directed cleavage of *ZmNAC1* confers lateral root  
677 development (Li *et al.*, 2012). However, our study was focused on the plant resistance  
678 through VIGS methods. In addition, the phenotype of the gene-silenced plants was  
679 shown in the early stage of development, the seedling. Of course, it would be  
680 interesting to investigate whether ghr-miR164 affects plant development in the future.

681 Previous reports involving the sRNA sequencing of cotton plants in response to *V.*  
682 *dahliae* focused on the early induction stage, typically 12-48 hours after inoculation  
683 when the fungus localized on the surface of the roots. We acquired the sRNA profiles  
684 of the plant response to *V. dahlia*, which had localized in the interior root tissues, a  
685 later induction stage. We identified 71 known miRNAs and 378 novel miRNAs from  
686 7- and 10-d *V. dahliae*-infected libraries and the control library and investigated their

687 target categories using GO and KEGG analyses. Thirty-four of these miRNAs showed  
688 significantly different expression in the two infected libraries compared to the control.  
689 More importantly, according to the degradome and sRNA sequencing, we selected the  
690 ghr-miR164-GhNAC100 module as representative to evaluate the function of the  
691 miRNAs in the response of the plant to the fungus through post-transcriptional  
692 regulation of the expression level of the target genes. The results showed that  
693 ghr-miR164-GhNAC100 participates in cotton plant resistance to *V. dahliae*.

694

695

#### 696 **Supplementary data**

697 **Table S1.** Summary of known miRNAs.

698 **Table S2.** Read abundance of known miRNAs.

699 **Table S3.** Size distribution of known miRNAs.

700 **Table S4.** Differentially expressed miRNAs identified in *V. dahliae*-infected cotton  
701 compared to control.

702 **Table S5.** GO enrichment analysis of the predicted targets of differentially expressed  
703 known and novel miRNAs in Vd7d library vs the control library.

704 **Table S6.** GO enrichment analysis of the predicted targets of differentially expressed  
705 known and novel miRNAs in Vd10d library vs the control library.

706 **Table S7.** List of target genes from degradome sequencing combining to differentially  
707 expressed known miRNAs.

708 **Table S8.** List of target genes from degradome sequencing combining to differentially  
709 expressed novel miRNAs.

710 **Table S9.** GO enrichment analysis of the targets of differentially expressed known  
711 and novel miRNAs based on degradome sequencing.

712 **Table S10.** KEGG enrichment analysis of the targets of differentially expressed  
713 known and novel miRNAs based on degradome sequencing.

714 **Table S11.** The primer sequences used in this study.

715 **Figure S1.** Schematic representation of analysis pipeline.

716 **Figure S2.** Member numbers of the known miRNA families

717 **Figure S3.** The phenotype of the *GhPDS*-silenced plants after VIGS treatment.

718

719

720 **Acknowledgements**

721 This work was supported by the National Natural Science Foundation of China

722 (31771848 and 31471544) and sponsored by the National Transgenic Major

723 Programmes of China (2016ZX08005-003-002 and 2018ZX0800901B).

724

725 **References**

- 726 **Allen E, Xie Z, Gustafson AM, Carrington JC.** 2005. microRNA-directed phasing  
727 during *trans*-acting siRNA biogenesis in plants. *Cell* **121**, 207-221.
- 728 **Anders S, Huber W.** 2010. Differential expression analysis for sequence count data.  
729 *Genome Biology* **11**, R106.
- 730 **Arazi T, Talmor-Neiman M, Stav R, Riese M, Huijser P, Baulcombe DC.** 2005.  
731 Cloning and characterization of micro-RNAs from moss. *The Plant Journal* **43**,  
732 837-848.
- 733 **Ashburner M, Ball CA, Blake JA, et al.** 2000. Gene Ontology: tool for the  
734 unification of biology. *Nature Genetics* **25**, 25.
- 735 **Baker CC, Sieber P, Wellmer F, Meyerowitz EM.** 2005. The *early extra petals1*  
736 mutant uncovers a role for microRNA *miR164c* in regulating petal number in  
737 *Arabidopsis*. *Current Biology* **15**, 303-315.
- 738 **Barik S, SarkarDas S, Singh A, Gautam V, Kumar P, Majee M, Sarkar AK.** 2014.  
739 Phylogenetic analysis reveals conservation and diversification of *microRNA166* genes  
740 among diverse plant species. *Genomics* **103**, 114-121.
- 741 **Bazzini AA, Almasia NI, Manacorda CA, et al.** 2009. Virus infection elevates  
742 transcriptional activity of miR164a promoter in plants. *BMC Plant Biology* **9**, 152.
- 743 **Bazzini AA, Hopp HE, Beachy RN, Asurmendi S.** 2007. Infection and  
744 coaccumulation of tobacco mosaic virus proteins alter microRNA levels, correlating  
745 with symptom and plant development. *Proceedings of the National Academy of*  
746 *Sciences of the United States of America* **104**, 12157-12162.
- 747 **Bejaranoalcazar J, Blanco Lopez MA, Melerovara JM, Jimenezdiaz RM.** 1997.  
748 The influence of verticillium wilt epidemics on cotton yield in southern Spain. *Plant*  
749 *Pathology* **46**, 168-178.
- 750 **Bhat RG, Subbarao KV.** 1999. Host range specificity in *verticillium dahliae*.  
751 *Phytopathology* **89**, 1218-1225.
- 752 **Fahlgren N, Howell MD, Kasschau KD, et al.** 2007. High-throughput sequencing of  
753 *Arabidopsis* microRNAs: evidence for frequent birth and death of *MIRNA* genes.  
754 *PLoS One* **2**, e219.

- 755 **Feng H, Duan X, Zhang Q, Li X, Wang B, Huang L, Wang X, Kang Z.** 2014. The  
756 target gene of *tae-miR164*, a novel NAC transcription factor from the NAM subfamily,  
757 negatively regulates resistance of wheat to stripe rust. *Molecular Plant Pathology* **15**,  
758 284-296.
- 759 **Friedlander MR, Mackowiak SD, Li N, Chen W, Rajewsky N.** 2012. miRDeep2  
760 accurately identifies known and hundreds of novel microRNA genes in seven animal  
761 clades. *Nucleic Acids Research* **40**, 37-52.
- 762 **German MA, Pillay M, Jeong DH, et al.** 2008. Global identification of  
763 microRNA-target RNA pairs by parallel analysis of RNA ends. *Nature Biotechnology*  
764 **26**, 941-946.
- 765 **Guo Y, Zhao S, Zhu C, Chang X, Yue C, Wang Z, Lin Y, Lai Z.** 2017.  
766 Identification of drought-responsive miRNAs and physiological characterization of  
767 tea plant (*Camellia sinensis* L.) under drought stress. *BMC Plant Biology* **17**, 211.
- 768 **Hao J, Tu L, Hu H, Tan J, Deng F, Tang W, Nie Y, Zhang X.** 2012. GbTCP, a  
769 cotton TCP transcription factor, confers fibre elongation and root hair development by  
770 a complex regulating system. *Journal of Experimental Botany* **63**, 6267-6281.
- 771 **He X, Sun Q, Jiang H, et al.** 2014. Identification of novel micromnas in the  
772 verticillium wilt-resistant upland cotton variety kv-1 by high-throughput sequencing.  
773 *Springerplus* **3**, 564.
- 774 **Jefferson RA, Kavanagh TA, Bevan MW.** 1987. GUS fusions: beta-glucuronidase  
775 as a sensitive and versatile gene fusion marker in higher plants. *The EMBO Journal* **6**,  
776 3901-3907.
- 777 **Jia X, Ren L, Chen QJ, Li R, Tang G.** 2009. UV-B-responsive microRNAs in  
778 *Populus tremula*. *Journal of Plant Physiology* **166**, 2046-2057.
- 779 **Jones-Rhoades MW, Bartel DP, Bartel B.** 2006. MicroRNAs and their regulatory  
780 roles in plants. *Annual Review of Plant Biology* **57**, 19-53.
- 781 **Kanehisa M, Goto S, Kawashima S, Okuno Y, Hattori M.** 2004. The KEGG  
782 resource for deciphering the genome. *Nucleic Acids Research* **32**, D277-D280.
- 783 **Khraiwesh B, Zhu JK, Zhu J.** 2012. Role of miRNAs and siRNAs in biotic and  
784 abiotic stress responses of plants. *Biochimica et Biophysica Acta* **1819**, 137-148.

- 785 **Kim JH, Woo HR, Kim J, Lim PO, Lee IC, Choi SH, Hwang D, Nam HG.** 2009.  
786 Trifurcate feed-forward regulation of age-dependent cell death involving *miR164* in  
787 Arabidopsis. *Science* **323**, 1053-1057.
- 788 **Klosterman SJ, Atallah ZK, Vallad GE, Subbarao KV.** 2009. Diversity,  
789 pathogenicity, and management of verticillium species. *Annual Review of*  
790 *Phytopathology* **47**, 39-62.
- 791 **Langmead B, Trapnell C, Pop M, Salzberg SL.** 2009. Ultrafast and  
792 memory-efficient alignment of short DNA sequences to the human genome. *Genome*  
793 *Biology* **10**, R25.
- 794 **Laufs P, Peaucelle A, Morin H, Traas J.** 2004. MicroRNA regulation of the *CUC*  
795 genes is required for boundary size control in Arabidopsis meristems. *Development*  
796 **131**, 4311-4322.
- 797 **Lee MH, Jeon HS, Kim HG, Park OK.** 2017. An Arabidopsis NAC transcription  
798 factor NAC4 promotes pathogen-induced cell death under negative regulation by  
799 microRNA164. *New Phytologist* **214**, 343-360.
- 800 **Li J, Guo G, Guo W, Guo G, Dan T, Ni Z, Sun Q, Yao Y.** 2012.  
801 miRNA164-directed cleavage of *ZmNAC1* confers lateral root development in maize  
802 (*Zea mays* L.). *BMC Plant Biology* **12**, 220.
- 803 **Li S, Liu L, Zhuang X, et al.** 2013. MicroRNAs inhibit the translation of target  
804 mRNAs on the endoplasmic reticulum in Arabidopsis. *Cell* **153**, 562-574.
- 805 **Li Y, Lu YG, Shi Y, et al.** 2014. Multiple rice microRNAs are involved in immunity  
806 against the blast fungus *Magnaporthe oryzae*. *Plant Physiology* **164**, 1077-1092.
- 807 **Liu H, Cheng Q, Zhe C, Tao Z, Yang X, Zhou H.** 2014. Identification of miRNAs  
808 and their target genes in developing maize ears by combined small rna and degradome  
809 sequencing. *BMC Genomics* **15**, 25.
- 810 **Liu Y, Nakayama N, Schiff M, Litt A, Irish VF, Dineshkumar SP.** 2004. Virus  
811 induced gene silencing of a deficiens ortholog in *Nicotiana benthamiana*. *Plant*  
812 *Molecular Biology* **54**, 701-711.
- 813 **Mallory AC, Dugas DV, Bartel DP, Bartel B.** 2004. MicroRNA regulation of  
814 NAC-domain targets is required for proper formation and separation of adjacent

- 815 embryonic, vegetative, and floral organs. *Current Biology* **14**, 1035-1046.
- 816 **Mao X, Cai T, Olyarchuk JG, Wei L.** 2005. Automated genome annotation and  
817 pathway identification using the KEGG Orthology (KO) as a controlled vocabulary.  
818 *Bioinformatics* **21**, 3787-3793.
- 819 **Mi S, Cai T, Hu Y, et al.** 2008. Sorting of small RNAs into Arabidopsis argonaute  
820 complexes is directed by the 5' terminal nucleotide. *Cell* **133**, 116-127.
- 821 **Navarro L, Dunoyer P, Jay F, Arnold B, Dharmasiri N, Estelle M, Voinnet O,**  
822 **Jones JD.** 2006. A plant miRNA contributes to antibacterial resistance by repressing  
823 auxin signaling. *Science* **312**, 436-439.
- 824 **Nuruzzaman M, Manimekalai R, Sharoni AM, Satoh K, Kondoh H, Ooka H,**  
825 **Kikuchi S.** 2010. Genome-wide analysis of NAC transcription factor family in rice.  
826 *Gene* **465**, 30-44.
- 827 **Ooka H, Satoh K, Doi K, Nagata T, et al.** 2003. Comprehensive analysis of NAC  
828 family genes in *Oryza sativa* and *Arabidopsis thaliana*. *DNA Research* **10**, 239-247.
- 829 **Pang J, Zhu Y, Li Q, Liu J, Tian Y, Liu Y, Wu J.** 2013. Development of  
830 Agrobacterium-mediated virus-induced gene silencing and performance evaluation of  
831 four marker genes in *Gossypium barbadense*. *PLoS One* **8**, e73211.
- 832 **Rajagopalan R, Vaucheret H, Trejo J, Bartel DP.** 2006. A diverse and  
833 evolutionarily fluid set of microRNAs in *Arabidopsis thaliana*. *Genes &*  
834 *Development* **20**, 3407-3425.
- 835 **Schwechheimer C, Zourelidou M, Bevan MW.** 1998. Plant transcription factor  
836 studies. *Annual Review of Plant Physiology and Plant Molecular Biology* **49**,  
837 127-150.
- 838 **Sha A, Zhao J, Yin K, Tang Y, Wang Y, Wei X, Hong Y, Liu Y.** 2014. Virus-based  
839 microRNA silencing in plants. *Plant Physiology* **164**, 36-47.
- 840 **Shi M, Hu X, Wei Y, Hou X, Yuan X, Liu J, Liu Y.** 2017. Genome-wide profiling of  
841 small rnas and degradome revealed conserved regulations of miRNAs on  
842 auxin-responsive genes during fruit enlargement in peaches. *Plant Physiology and*  
843 *Biochemistry* **18**, 2599.
- 844 **Shriram V, Kumar V, Devarumath RM, Khare TS, Wani SH.** 2016. MicroRNAs

845 as potential targets for abiotic stress tolerance in plants. *Frontiers in Plant Science* **7**,  
846 817.

847 **Sieber P, Wellmer F, Gheyselincx J, Riechmann JL, Meyerowitz EM.** 2007.  
848 Redundancy and specialization among plant microRNAs: role of the *MIR164* family  
849 in developmental robustness. *Development* **134**, 1051-1060.

850 **Sink KC, Grey WE.** 1999. A root-injection method to assess verticillium wilt  
851 resistance of peppermint (*mentha × piperita* L.) and its use in identifying resistant  
852 somaclones of cv. black mitcham. *Euphytica* **106**, 223-230.

853 **Song QX, Liu YF, Hu XY, Zhang WK, Ma B, Chen SY.** 2011. Identification of  
854 miRNAs and their target genes in developing soybean seeds by deep sequencing.  
855 *BMC Plant Biology* **11**, 5.

856 **Tamura K, Peterson D, Peterson N, Stecher G, Nei M, Kumar S.** 2011. MEGA5:  
857 molecular evolutionary genetics analysis using maximum likelihood, evolutionary  
858 distance, and maximum parsimony methods. *Molecular Biology and Evolution* **28**,  
859 2731-2739.

860 **Varkonyi-Gasic E, Wu R, Wood M, Walton EF, Hellens RP.** 2007. Protocol: a  
861 highly sensitive RT-PCR method for detection and quantification of microRNAs.  
862 *Plant Methods* **3**, 12.

863 **Wang C, He X, Wang X, Zhang S, Guo X.** 2017a. ghr-miR5272a-mediated  
864 regulation of *GhMCK6* gene transcription contributes to the immune response in  
865 cotton. *Journal of Experimental Botany* **68**, 5895-5906.

866 **Wang L, Wu SM, Zhu Y, Fan Q, Zhang ZN, Hu G, Peng QZ, Wu JH.** 2017b.  
867 Functional characterization of a novel jasmonate ZIM-domain interactor (NINJA)  
868 from upland cotton (*Gossypium hirsutum*). *Plant Physiology and Biochemistry* **112**,  
869 152-160.

870 **Wang Q, Liu N, Yang X, Tu L, Zhang X.** 2016. Small RNA-mediated responses to  
871 low- and high-temperature stresses in cotton. *Scientific Reports* **6**, 35558.

872 **Wang YQ, Chen DJ, Wang DM, Huang QS, Yao ZP, Liu FJ.** 2004.  
873 Over-expression of *Gastrodia* anti-fungal protein enhances *Verticillium* wilt resistance  
874 in coloured cotton. *Plant Breeding* **123**, 454-459.



- 875 **Wei LQ, Yan LF, Wang T.** 2011. Deep sequencing on genome-wide scale reveals the  
876 unique composition and expression patterns of microRNAs in developing pollen of  
877 *Oryza sativa*. *Genome Biology* **12**, R53.
- 878 **Xie F, Wang Q, Sun R, Zhang B.** 2015. Deep sequencing reveals important roles of  
879 microRNAs in response to drought and salinity stress in cotton. *Journal of*  
880 *Experimental Botany* **66**, 789-804.
- 881 **Xin M, Wang Y, Yao Y, Xie C, Peng H, Ni Z, Sun Q.** 2010. Diverse set of  
882 microRNAs are responsive to powdery mildew infection and heat stress in wheat  
883 (*Triticum aestivum* L.). *BMC Plant Biology* **10**, 123.
- 884 **Yan J, Gu Y, Jia X, Kang W, Pan S, Tang X, Chen X, Tang G.** 2012. Effective  
885 small RNA destruction by the expression of a short tandem target mimic in  
886 *Arabidopsis*. *The Plant Cell* **24**, 415-427.
- 887 **Yin Z, Li Y, Han X, Shen F.** 2012. Genome-wide profiling of miRNAs and other  
888 small non-coding RNAs in the *Verticillium dahliae*-inoculated cotton roots. *PLoS One*  
889 **7**, e35765.
- 890 **Yip HK, Floyd SK, Sakakibara K, Bowman JL.** 2016. Class III HD-Zip activity  
891 coordinates leaf development in *Physcomitrella patens*. *Developmental Biology* **419**,  
892 184-197.
- 893 **Yu F, Huaxia Y, Lu W, Wu C, Cao X, Guo X.** 2012. GhWRKY15, a member of the  
894 WRKY transcription factor family identified from cotton (*Gossypium hirsutum* L.), is  
895 involved in disease resistance and plant development. *BMC Plant Biology* **12**, 133.
- 896 **Zhang T, Zhao YL, Zhao JH, Wang S, Jin Y, Chen ZQ, Fang YY, Hua CL, Ding**  
897 **SW, Guo HS.** 2016. Cotton plants export microRNAs to inhibit virulence gene  
898 expression in a fungal pathogen. *Nature Plants* **2**, 16153.
- 899 **Zhang Y, Wang W, Chen J, Liu J, Xia M, Shen F.** 2015a. Identification of miRNAs  
900 and their targets in cotton inoculated with *verticillium dahliae* by high-throughput  
901 sequencing and degradome analysis. *International Journal of Molecular Sciences* **16**,  
902 14749-14768.
- 903 **Zhang Z, Jiang L, Wang J, Gu P, Chen M.** 2015b. MTide: an integrated tool for the  
904 identification of miRNA-target interaction in plants. *Bioinformatics* **31**, 290-291.

905 **Zhao JP, Jiang XL, Zhang BY, Su XH.** 2012. Involvement of microRNA-mediated  
906 gene expression regulation in the pathological development of stem canker disease in  
907 *Populus trichocarpa*. PLoS One **7**, e44968.  
908 **Zhu QH, Fan L, Liu Y, Xu H, Llewellyn D, Wilson I.** 2013. miR482 regulation of  
909 *NBS-LRR* defense genes during fungal pathogen infection in cotton. PLoS One **8**,  
910 e84390.  
911

912 **Tables**

913 **Table 1. Cotton sRNA categorization and unannotated reads matched to the**  
 914 **genome**

915

| Types<br>(clean reads) | 7d       |                | 10d      |                | CK       |                |
|------------------------|----------|----------------|----------|----------------|----------|----------------|
|                        | Number   | Percentage (%) | Number   | Percentage (%) | Number   | Percentage (%) |
| Total                  | 20221992 | 100.00         | 35104139 | 100.00         | 34150616 | 100.00         |
| Repeat base            | 25061    | 0.12           | 18338    | 0.05           | 39101    | 0.11           |
| rRNA                   | 12278639 | 60.72          | 22972108 | 65.44          | 22896039 | 67.04          |
| tRNA                   | 447177   | 2.21           | 620464   | 1.77           | 706509   | 2.07           |
| snoRNA                 | 19622    | 0.10           | 54464    | 0.16           | 39284    | 0.12           |
| Unannotated            | 7451493  | 36.85          | 11438765 | 32.59          | 10469683 | 30.66          |
| Mapped reads           | 3775953  | -              | 3944094  | -              | 4889704  | -              |
| Mapped reads(+)        | 2750389  | -              | 2869295  | -              | 3572630  | -              |
| Mapped reads(-)        | 1025564  | -              | 1074799  | -              | 1317074  | -              |

916 Notes: rRNA, ribosomal RNA; tRNA, transfer RNA; snoRNA, small nucleolar RNAs;

917 Mapped reads (+) and Mapped reads (-), the number of clean reads matched on the

918 positive and the negative chains from the cotton genome.

919

920 **Figure legends**

921 **Figure 1. The time course of *V. dahliae* colonization and growth in the interior of**  
922 **cotton roots**

923 (A) Fungal DNA copies/plant DNA copies in roots inoculated with *V. dahliae*. (B)  
924 Fungal recovery growth from the root fragments placed on PDA media at different  
925 time points of fungal inoculation. Photos were taken at 5 days after plating. (C) *V.*  
926 *dahliae* recovery rate of the root fragments (n=90). Error bars represent the SD of  
927 three biological replicates. dpi represents day post inoculation.

928

929 **Figure 2. sRNA and miRNA analyses of the 7- and 10-dpi libraries and the**  
930 **control**

931 (A) Venn diagram for special and common unique reads between the libraries. (B)  
932 Size distribution of the matched sRNA reads in cotton. (C) Venn diagram for special  
933 and common known and novel miRNAs among the three libraries. (D) miRNA first  
934 nucleotide bias (left panel) and miRNA nucleotide bias at each position (right panel)  
935 among the three sRNA libraries. Vd7d and Vd10d, represent 7 and 10 days after *V.*  
936 *dahliae* infection. CK, mixed mock treatment samples at 7 and 10 days.

937

938 **Figure 3. Analyses of different expression of the miRNAs and target gene**  
939 **identification as well as expression authenticity**

940 (A) Heatmaps of differently expressed miRNA in the 7- and 10-d treated libraries  
941 compared to the control. The colour bar represents the relative signal intensity values  
942 from red (upregulated) to blue (downregulated), indicating a range of [4,-4]. (B)  
943 Cotton miRNA and target alignment and its T-plot validated by degradome  
944 sequencing. The T-plots indicate the distribution of the degradome tags along the full  
945 length of the target mRNA sequencing. The black arrows indicate the cleavage sites of  
946 the target genes. (C) Expression profiles of miRNAs and corresponding targets after *V.*  
947 *dahliae* was inoculated by qPCR. miRNAs and their corresponding targets detected  
948 from the roots infected with *V. dahliae* and mock-treated control at 10 dpi,

949 respectively. Error bars represent the SD of three biological replicates.

950

951 **Figure 4. ghr-miR164 regulates *GhNAC100* expression by a post-transcriptional**  
952 **process**

953 (A) Phylogenetic tree analysis of GhNACs and AtNACs. The Neighbour-joining  
954 method of MEGA (version 5.2) was used. Bootstrap analyses were computed with  
955 1000 replicates. Accession numbers are: AtNAC32 (AT1G77450), AtNAC102  
956 (AT5G63790), GhNAC76 (AHJ79217.1), AtNAC100 (AT5G61430), GhNAC35  
957 (AHJ79176.1), GhNAC62 (AHJ79203.1), GhNAC58 (AHJ79199.1), AtNAC82  
958 (AT5G09330), AtNAC67 (AT4G01520), and GhNAC23 (AHJ79164.1). (B) Primer  
959 design outline and qPCR analysis of the *GhNAC100* mRNA transcripts associated  
960 with the ghr-miR164 cleavage. (C) Construction of the effector and reporter vectors.  
961 Red letters represent mutated bases. The black arrow indicates the cleavage site of  
962 *GhNAC100*. (D) GUS staining of infiltrated sites of the leaf with different vectors. (E)  
963 Quantitative analysis of GUS activity from (D) with the 4-MU assay. (F)  
964 Accumulation of ghr-miR164 and *GhNAC100* in the time course of cotton roots  
965 infected with *V. dahliae*. Error bars represent the SD of three biological replicates.

966

967 **Figure 5. The functional dissection of the ghr-miR164-*GhNAC100* module in**  
968 **defence against *V. dahliae***

969 (A) Relative expression levels of ghr-miR164 and *GhNAC100* in the *TRV:STTM164*  
970 and *TRV:GhNAC100* compared to the *TRV:00* plants. (B) Disease symptom  
971 phenotypes of the ghr-miR164-silenced and *GhNAC100*-silenced plants inoculated  
972 with *V. dahliae*. (C) Disease index of the silenced plants at 23 dpi. Significant  
973 differences were determined using Student's *t*-test; an asterisk indicates  $P < 0.05$ . (D)  
974 Fungal recovery assay. The experiment was performed using the stem sections from  
975 cotton plants at 23 dpi placed on PDA media. Photos were taken 5 days after plating.  
976 (E) The levels of the *V. dahliae* biomass in the infested stems by qPCR. Error bars  
977 represent the SD of three biological replicates. *TRV:164* and *TRV:NAC* represent  
978 *TRV:STTM164* and *TRV:GhNAC100*, respectively.



## Figures

Figure 1

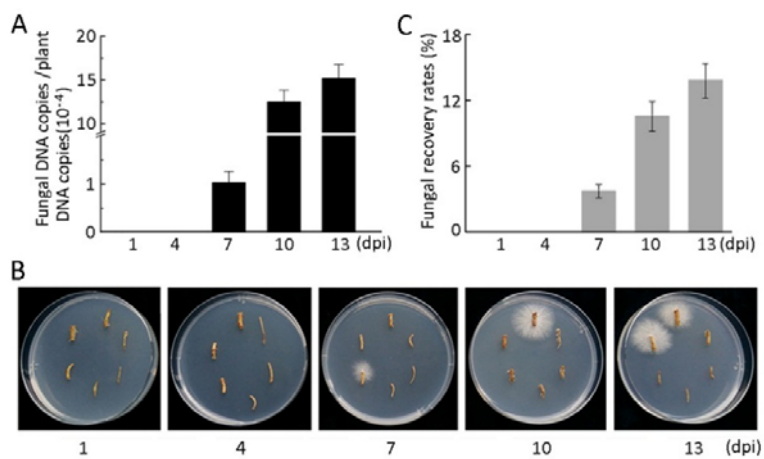

**Figure 2**

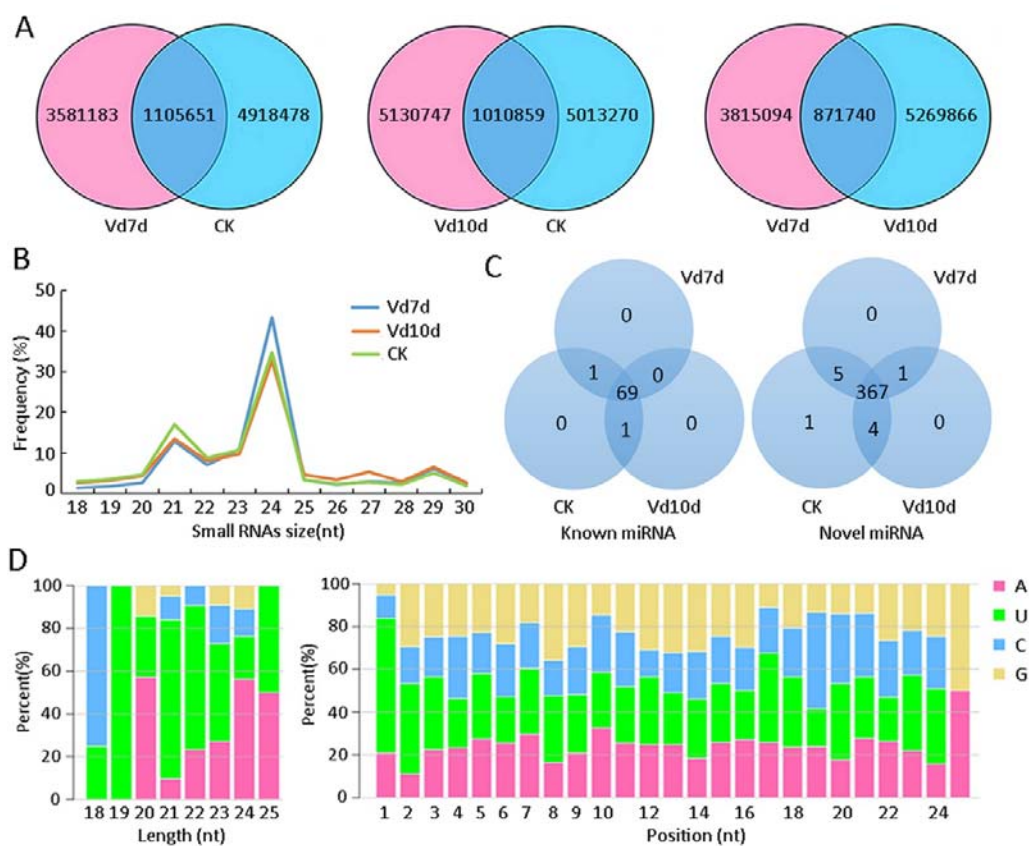



**Figure 3**

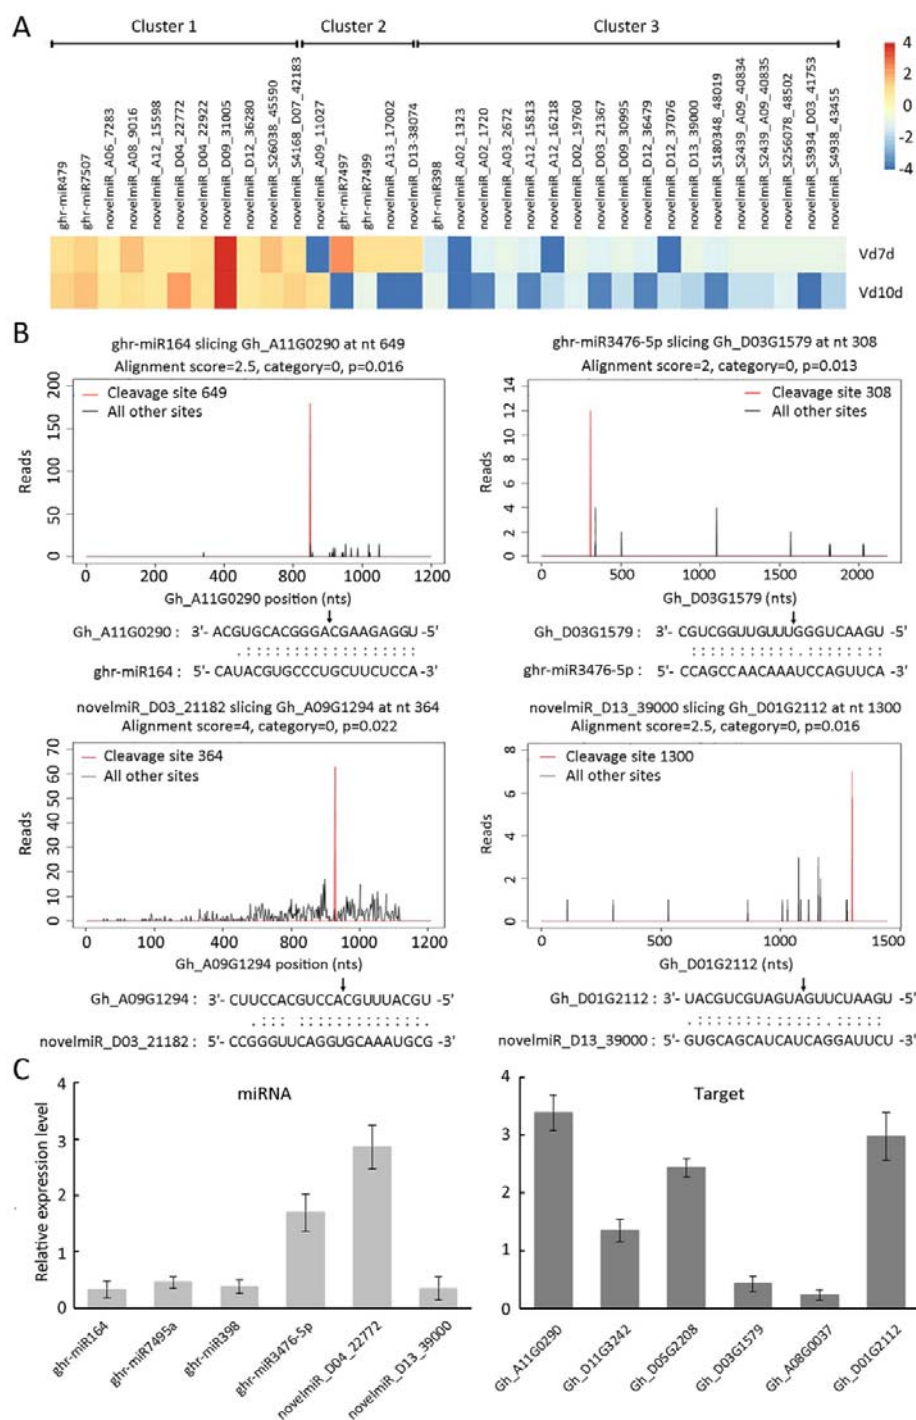

**Figure 4**

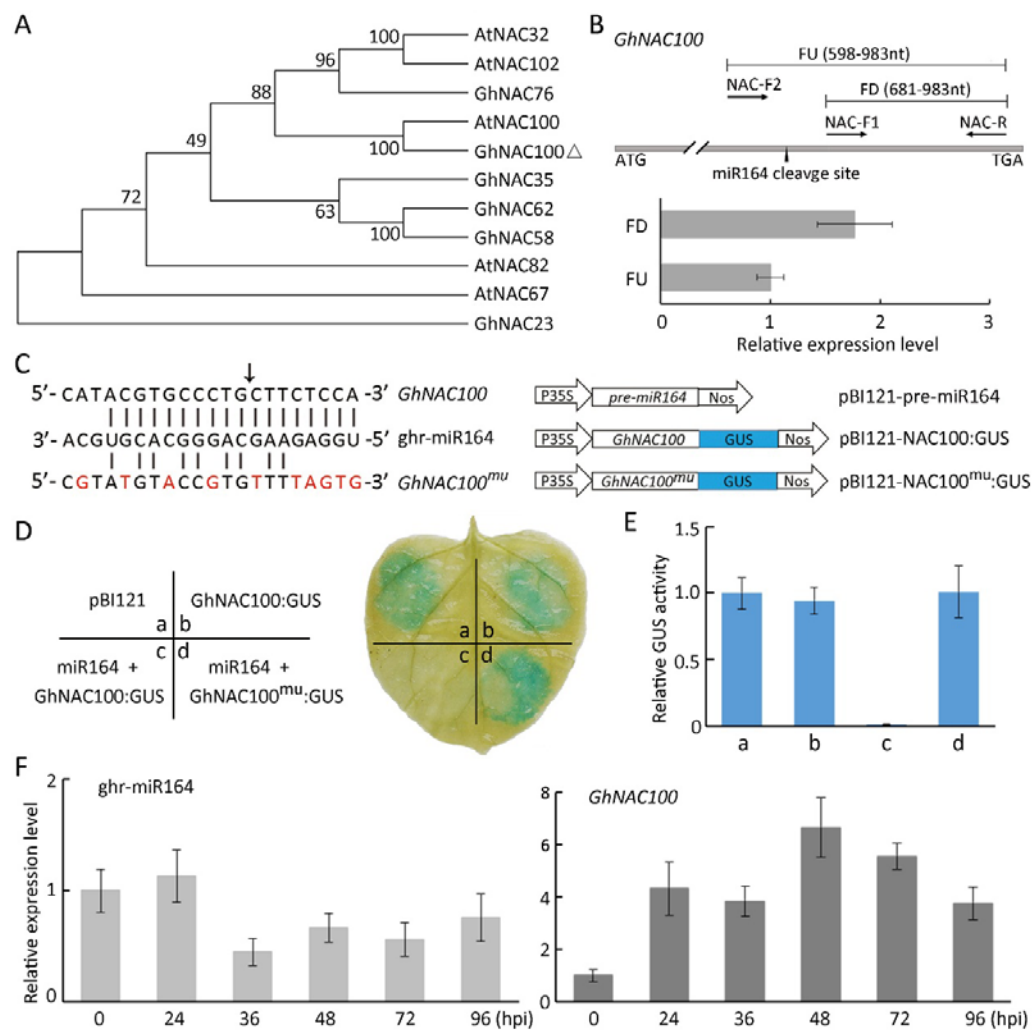

**Figure 5**

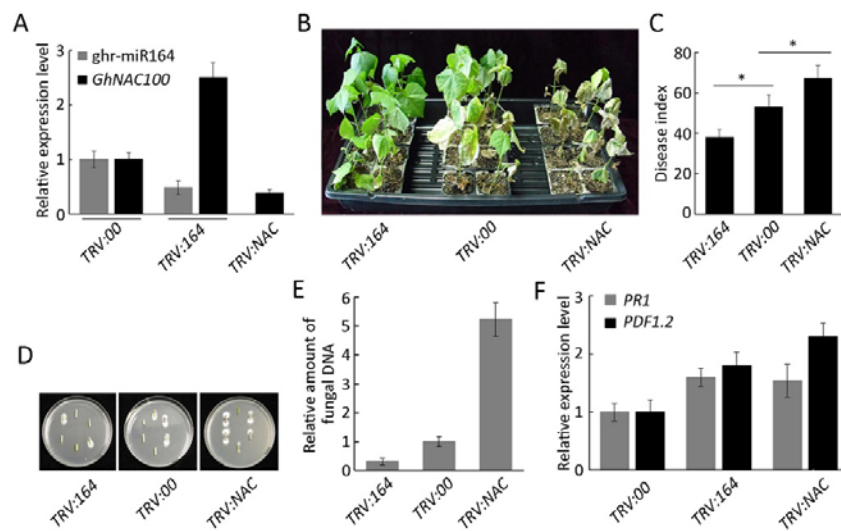

Source: https://www.biorxiv.org/content/10.1101/440826v1.full.pdf
